# Supplementary material for: Improved specificity of a probe-based real-time PCR for the detection of Dirofilaria immitis in canine blood
Source: Research Square preprint supplement (doi:10.21203/rs.3.rs-8379526/v1), 2025-12-19
Supplement: Supplementary file 1 [file 4bee6e3896b8e10cf48b2cd5.docx]

**Supplementary File, Figure S1**. An outline of what was included for each qPCR plate, including the originally published probe and the newly designed probes.

**Supplementary File, Figure S2**. Correlation between the original probe qPCR Ct values and the number of microfilariae in blood.

**Supplementary File, Figure S3**. Correlation between the probe two qPCR Ct values and the number of microfilariae in blood.

**Supplementary File, Figure S4**. Correlation between the probe three qPCR Ct values and the number of microfilariae in blood.

**Supplementary File, Figure S5.** A visual representation of the newly designed protocols, probe 2 and probe 3, along with the original probe, targeting the cytochrome c oxidase subunit 1 for *Dirofilaria immitis* from various hosts. Also included are sequences of *Dirofilaria repens*, *Spirocerca lupi*, and *Angiostrongylus vasorum* to highlight bioinformatic differences.
